# Supplementary material for: Multiscale Modeling of Influenza A Virus Infection Supports the Development of Direct-Acting Antivirals
Source: PLoS Comput Biol. 2013 Nov 21;9(11):e1003372. doi: 10.1371/journal.pcbi.1003372 (PMC3836700; doi:10.1371/journal.pcbi.1003372)
Supplement: Table S1 — Initial conditions for the multiscale model. This table lists all non-zero initial conditions that were used in simulations. (DOC) [file pcbi.1003372.s001.doc]

**Table S1**. Initial conditions for the multiscale model.

| **Simulation** | **Model** | **Non-zero initial conditions** |
| --- | --- | --- |
| **Figure 1D, 2A** | intracellular |  |
| **Figure 2B** | intracellular |  |
|  | extracellular |  |
| **Figure 3** | intracellular |  |
|  | extracellular (MOI 10-4) |  |
|  | extracellular (MOI 3) |  |
| **Figure 4, 5, 6** | intracellular |  |
| **Figure 7** | intracellular |  |
|  | extracellular |  |
