# Supplementary material for: Multiscale Modeling of Influenza A Virus Infection Supports the Development of Direct-Acting Antivirals
Source: PLoS Comput Biol. 2013 Nov 21;9(11):e1003372. doi: 10.1371/journal.pcbi.1003372 (PMC3836700; doi:10.1371/journal.pcbi.1003372)
Supplement: Table S4 — Parameters corresponding to the drug targets in Figure 5 and 7. This table shows which parameters in the model correspond to the drug targets shown in Figure 5 and 7. (DOC) [file pcbi.1003372.s004.doc]

**Table S1.** Parameters corresponding to the drug targets in Figure 5 and 7.

| **Mechanism** | **Parameter** |
| --- | --- |
| assembly of RdRp-complexes |  |
| binding of M1 to nuclear vRNPs |  |
| binding of RdRp to viral RNAs |  |
| cRNA synthesis |  |
| encapsidation of viral RNAs by NP |  |
| endocytosis of virions |  |
| fusion with endosomes |  |
| nuclear export of viral genomes |  |
| nuclear import of viral genomes |  |
| viral mRNA synthesis |  |
| viral protein synthesis |  |
| virus binding to high-affinity sites |  |
| virus binding to low-affinity sites |  |
| virus assembly/release |  |
| vRNA synthesis |  |
| splicing of mRNAs for M2 |  |
| splicing of mRNAs for NEP |  |
